# Supplementary material
Source: publisher figshare collection journal article supplement (https://frontiersin.figshare.com/ndownloader/files/27865821)
Supplement: Supplementary file 1 [file 27865821]

# Supplementary Material

S1 Table. List of ESMs with daily data available and better comparative metrics

S2 Table. Excel calculator for solar radiation and vapour pressure

S1 Figure. Land cover change of built up area in Medan, Denpasar, and Surabaya

S2 Figure. Change in future UTCI under LC scenario in Surabaya
